# Supplementary material for: Synthesis and characterization of diketopyrrolopyrrole-based conjugated molecules flanked by indenothiophene and benzoindenothiophene derivatives
Source: Royal Society of Chemistry journal article supplement (doi:10.1039/c5tc02288f), 2015-01-01
Supplement: c5tc02288f1.pdf [file c5tc02288f1.pdf]

## Electronic Supplementary Information *for*

### Synthesis and Characterization of Diketopyrrolopyrrole-Based Conjugated Molecules Flanked by Indenothiophene and Benzoindenothiophene Derivatives

Hao Song,<sup>a,b</sup> Yao Gao,<sup>b</sup> Weili Li,<sup>b</sup> Hongkun Tian,<sup>b\*</sup> Donghang Yan,<sup>b</sup> Yanhou Geng,<sup>a,b\*</sup> and Fosong Wang<sup>b</sup>

<sup>a</sup>School of Material Science and Engineering and Collaborative Innovation Center of Chemical Science and Engineering (Tianjin), Tianjin University, Tianjin 300072, P. R. China.

<sup>b</sup>State Key Laboratory of Polymer Physics and Chemistry, Changchun Institute of Applied Chemistry, Chinese Academy of Sciences, Changchun, 130022, P. R. China.

E-mails: [yhgeng@ciac.ac.cn](mailto:yhgeng@ciac.ac.cn), [hktian@ciac.ac.cn](mailto:hktian@ciac.ac.cn)

#### Characterization and instrumentation

<sup>1</sup>H NMR and <sup>13</sup>C NMR spectra were measured by a Bruker 400-MHz spectrometer in CDCl<sub>3</sub> (the <sup>1</sup>H NMR of **DPP-NaCO** was in CD<sub>2</sub>Cl<sub>2</sub>) at room temperature with tetramethylsilane (TMS) as internal standard. Molecular mass was characterized by a Bruker/AutoflexIII Smartbean MALDI mass spectrometer. FT-IR spectra were obtained in chloroform solvents on a BIOFTS-7 Fourier transform infrared spectrometer. Elemental analysis was carried out on a VarioEL elemental analysis system. TGA was recorded by Perkin-Elmer TGA-7 at a heating rate of 10 °C/min under N<sub>2</sub> and DSC was measured by Perkin-Elmer DSC7 thermal analyzer at a scanning rate of 10 °C/min under N<sub>2</sub>. Absorption spectra were obtained on a PerkinElmer Lambda35 UV/Vis Spectrometer. Solution spectra were measured in chloroform with a concentration of 1×10<sup>-5</sup> mol/L and films were prepared by spin-casting with chloroform as solvent. Cyclic voltamogram (CV) was obtained by a CHI660 electrochemical analyzer in a three-electrode cell with a glassy carbon working electrode, a Pt wire counter electrode and a saturated calomel electrode (SCE) reference electrode, at a scan rate of 100 mV/s in anhydrous dichloromethane solution with 0.1 M tetrabutylammonium hexafluorophosphate as supporting electrolyte. The potential was calibrated by ferrocene/ferrocenium (Fc/Fc<sup>+</sup>), the highest occupied

molecular orbital (HOMO) and the lowest unoccupied molecular orbital (LUMO) energy levels were estimated by the equations:  $\text{HOMO} = - (4.80 + E_{\text{onset}}^{\text{ox}}) \text{ eV}$ ,  $\text{LUMO} = - (4.80 + E_{\text{onset}}^{\text{re}}) \text{ eV}$ . DFT calculation was carried out on the Gaussian 09 package program by means of B3LYP/6-31G. Out-of-plane X-ray diffraction (XRD) was recorded on Bruker D8 Discover thin-film diffractometer with Cu K $\alpha$  radiation ( $\lambda = 1.54056 \text{ \AA}$ ) operated at 40 kV and 40 mA. In-plane XRD of the thin films were measured with a Rigaku Smart Lab with Cu K $\alpha$  source ( $\lambda = 1.54056 \text{ \AA}$ ) in the air. AFM images were recorded in tapping mode on a SPI3800N (Seiko Instruments Inc., Japan).

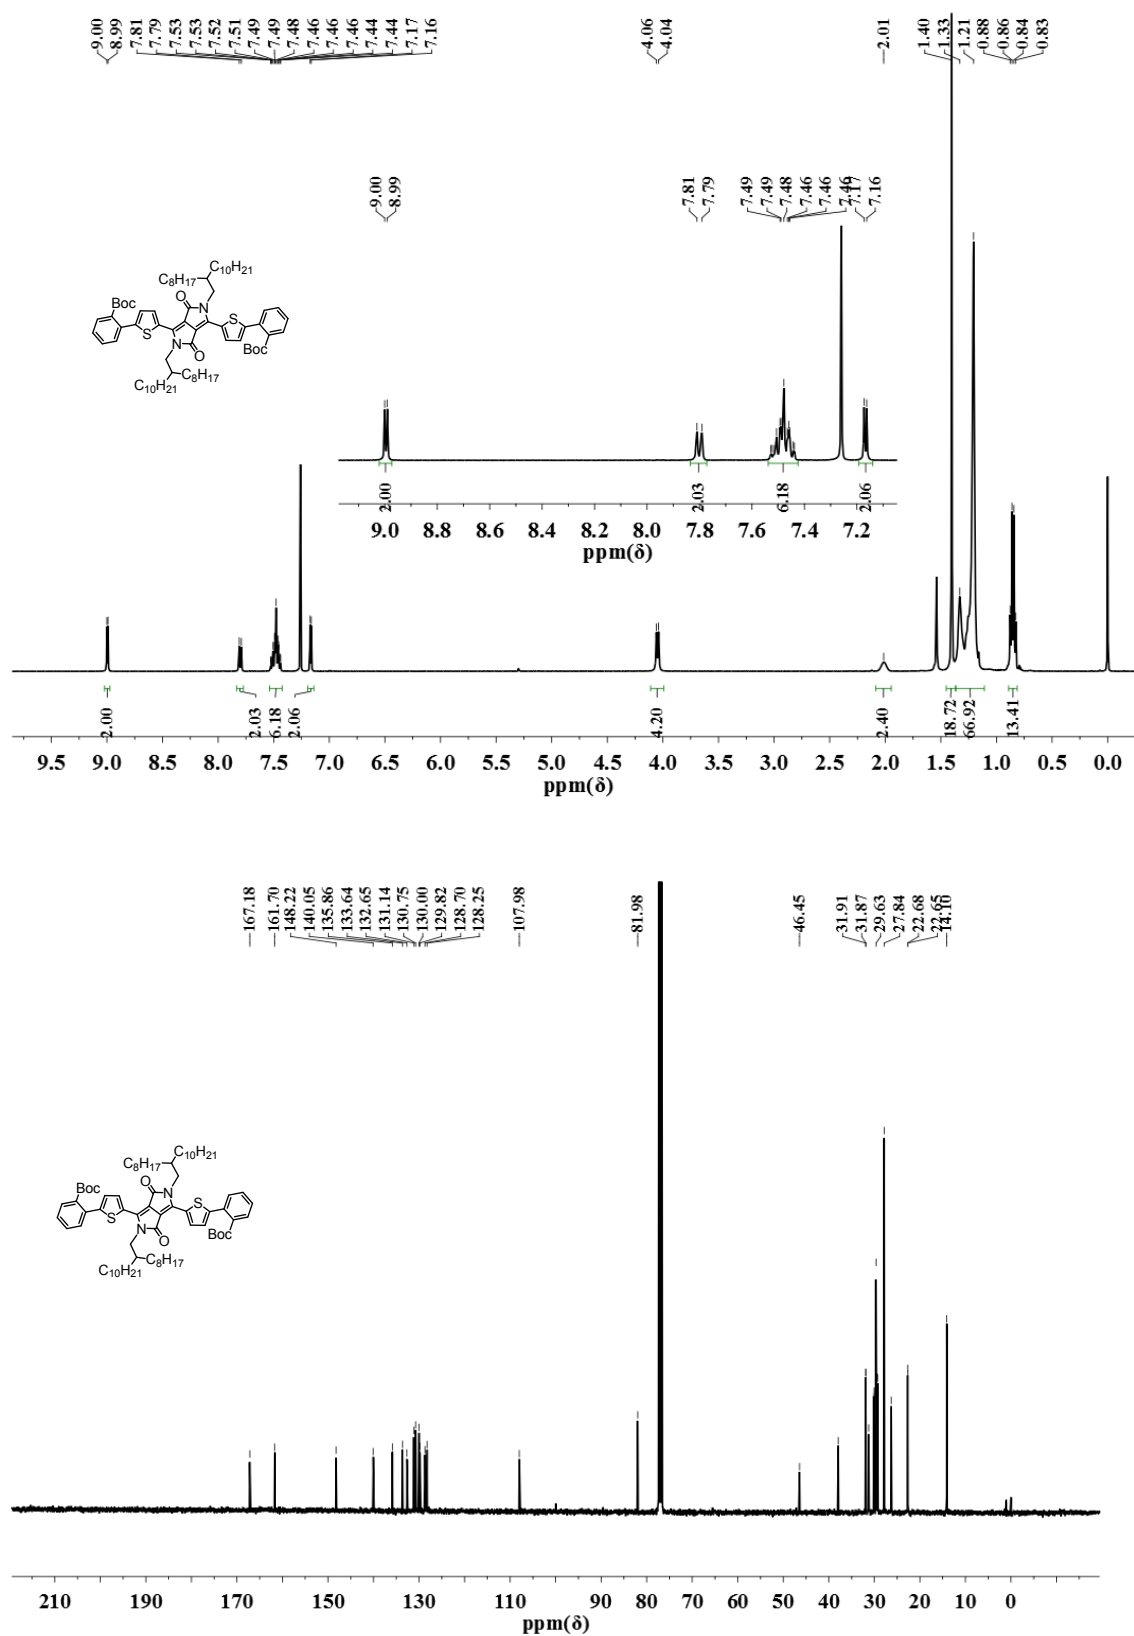

Figure S1 <sup>1</sup>H NMR (top) and <sup>13</sup>C NMR (bottom) spectra of di-*t*-butyl 2,2'-(5,5'-(2,5-bis(2-octyldecyl)-3,6-dioxo-2,3,5,6-tetrahydropyrrolo[3,4-*c*]pyrrole-1,4-diyl)bis(thiophene-5,2-diyl)dibenzoate (**4**).

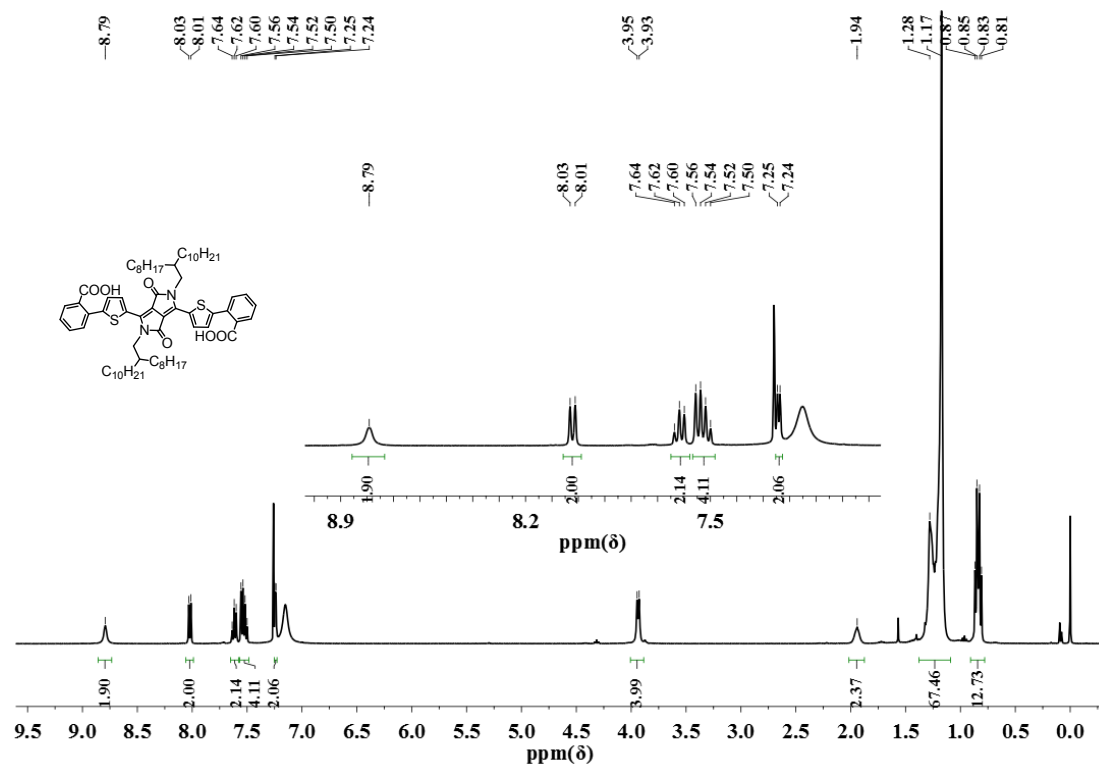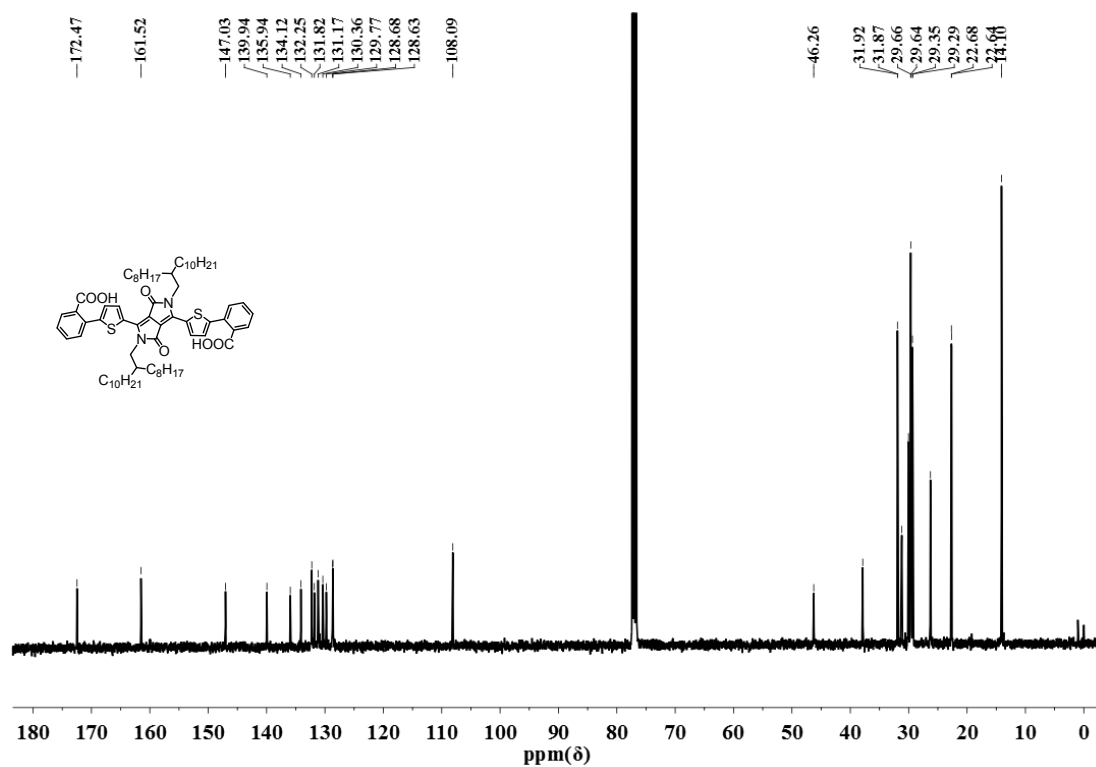

Figure S2  $^1H$  NMR (top) and  $^{13}C$  NMR (bottom) spectra of 2,2'-(5,5'-(2,5-bis(2-octyldecyl)-3,6-dioxo-2,3,5,6-tetrahydropyrrolo[3,4-*c*]pyrrole-1,4-diyl)bis(thiophene-5,2-diyl)dibenzoic acid (5).

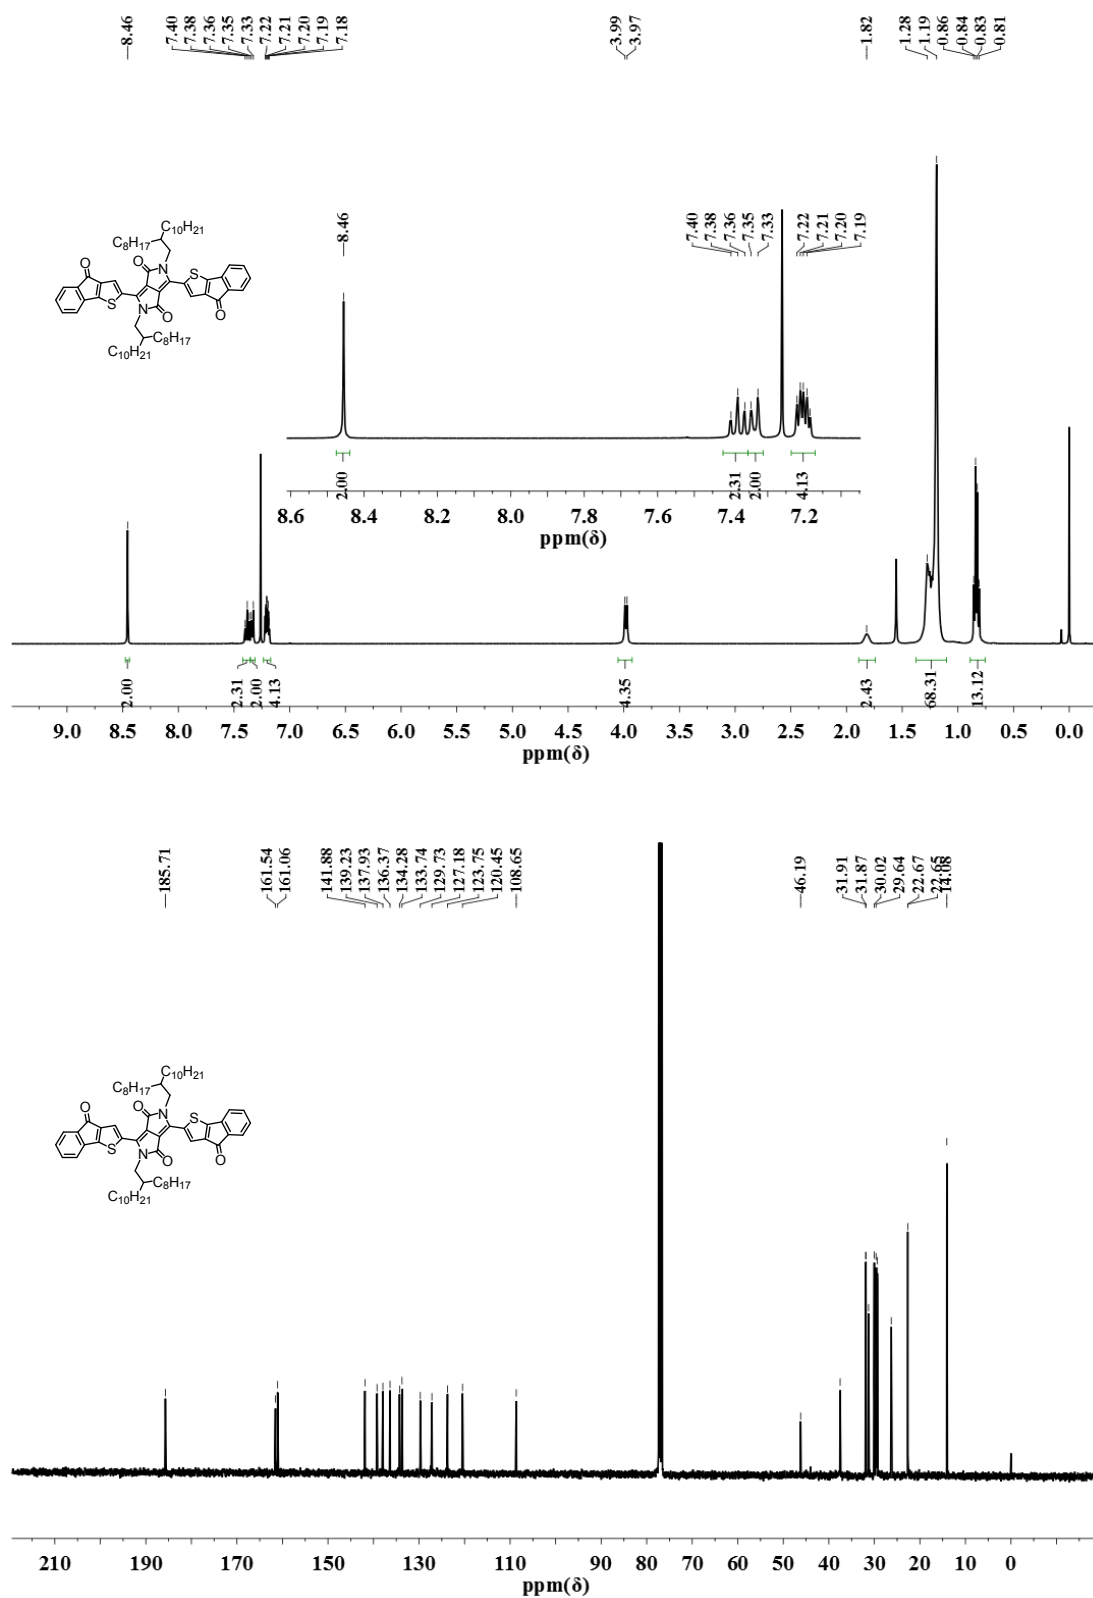

Figure S3 <sup>1</sup>H NMR (top) and <sup>13</sup>C NMR (bottom) spectra of 2,5-bis(2-octyldodecyl)-3,6-bis(4-oxo-4H-indeno[1,2-*b*]thiophen-2-yl)pyrrolo[3,4-*c*]pyrrole-1,4(2H,5H)-dione (**DPP-PhCO**).

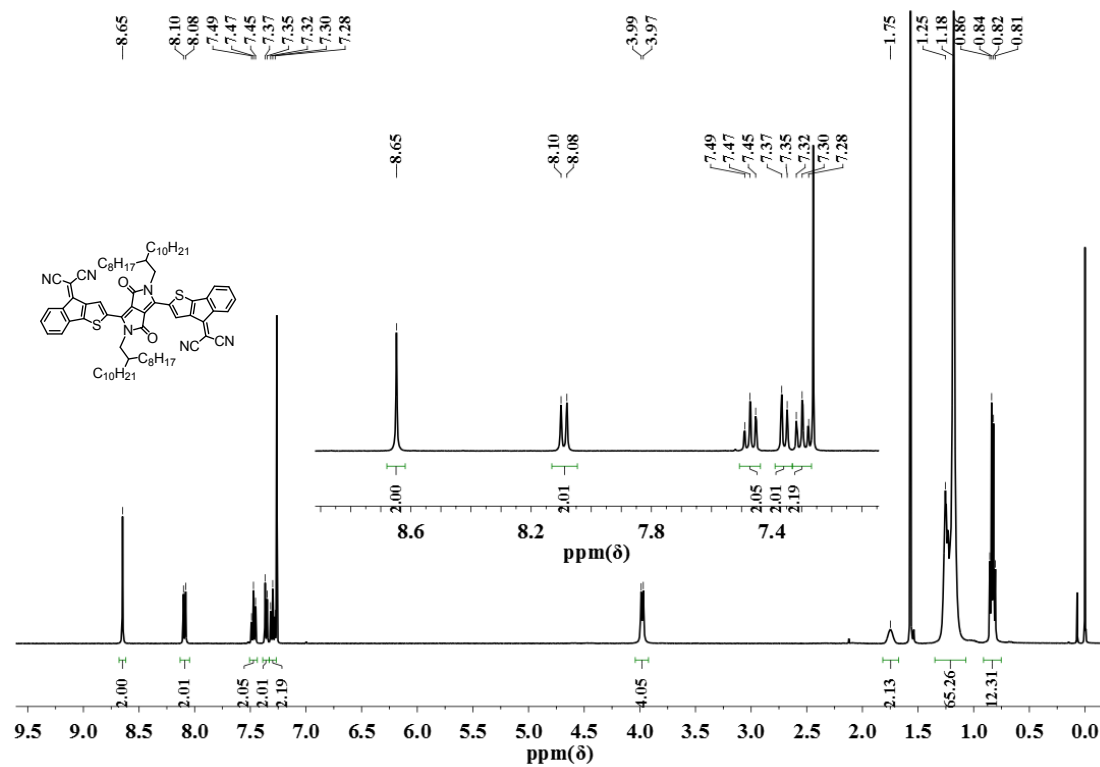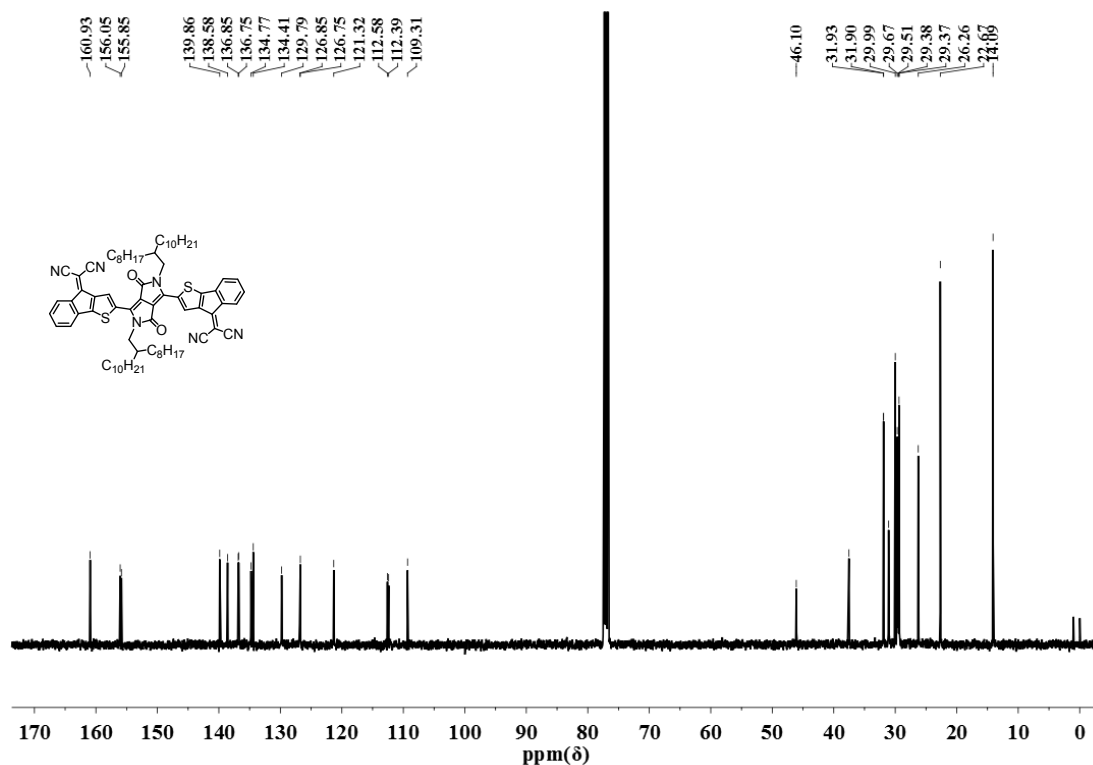

Figure S4 <sup>1</sup>H NMR (top) and <sup>13</sup>C NMR (bottom) spectra of 2,2'-(2,2'-(2,5-bis(2-octyldodecyl)-3,6-dioxo-2,3,5,6-tetrahydro-pyrrolo[3,4-*c*]pyrrole-1,4-diyl)bis(4H-indeno[1,2-*b*]thiophene-2-yl-4-ylidene))dimalononitrile (DPP-PhCN)

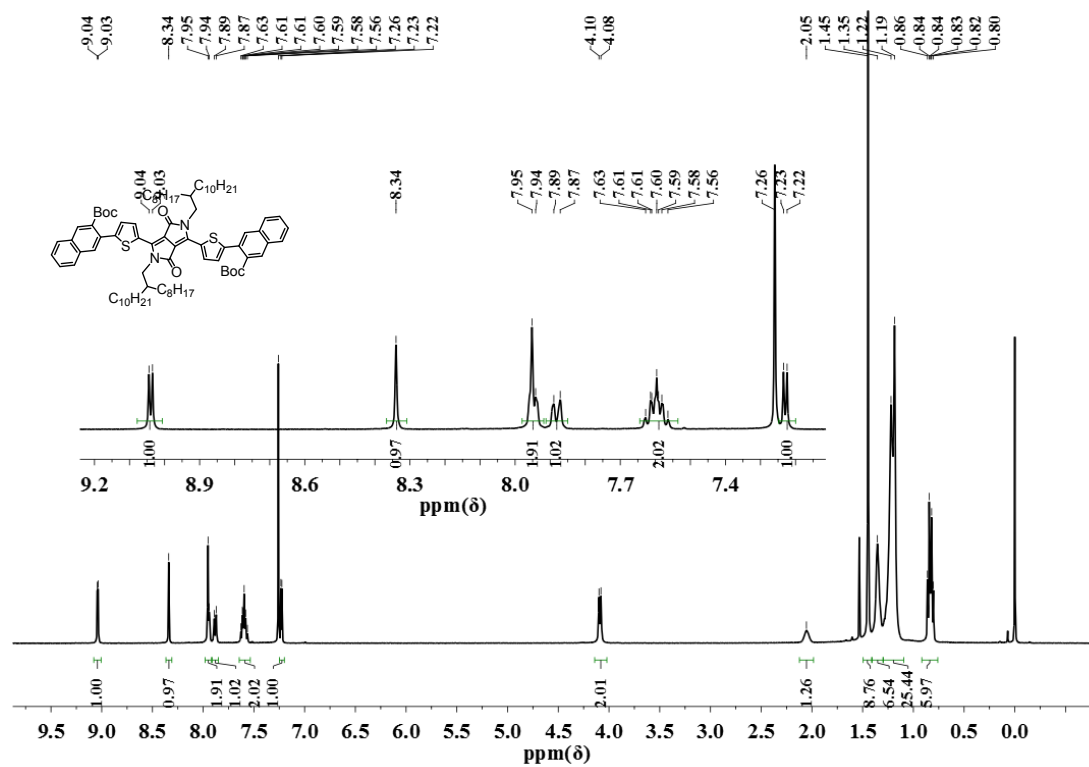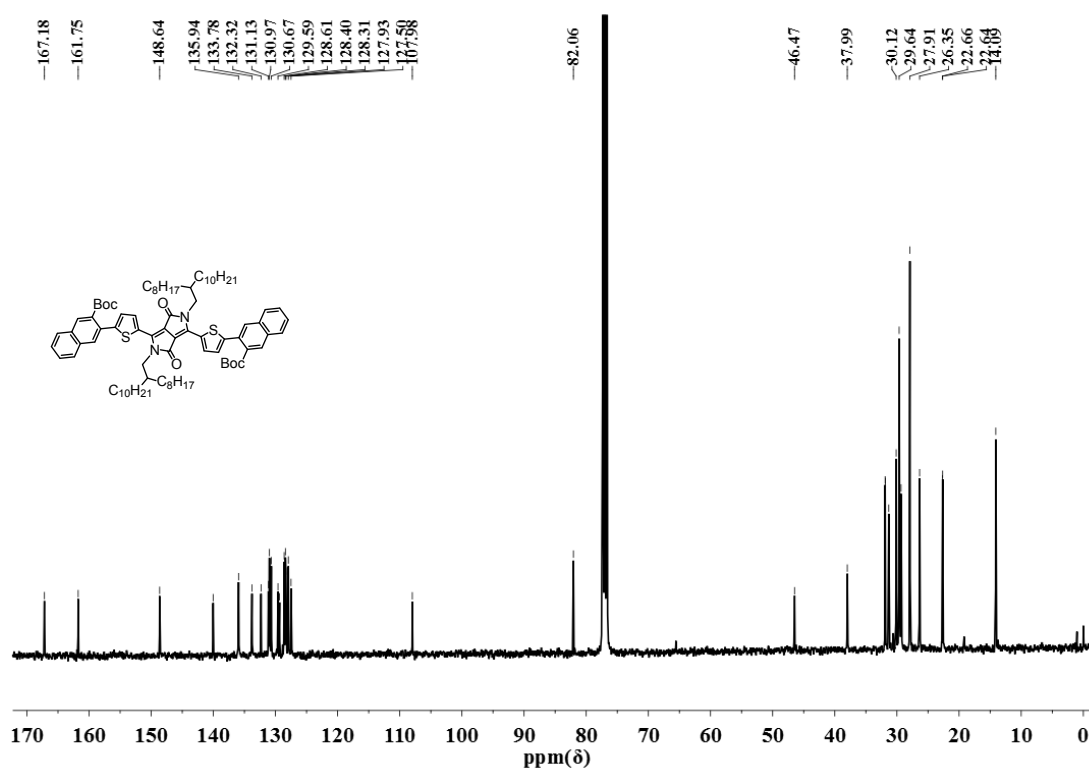

Figure S5 <sup>1</sup>H NMR (top) and <sup>13</sup>C NMR (bottom) spectra of di-*t*-butyl 3,3'-(5,5'-(2,5-bis(2-octyldodecyl)-3,6-dioxo-2,3,5,6-tetrahydropyrrolo[3,4-*c*]pyrrole-1,4-diyl)bis(thiophene-5,2-diyl))bis(2-naphthoate) (7).

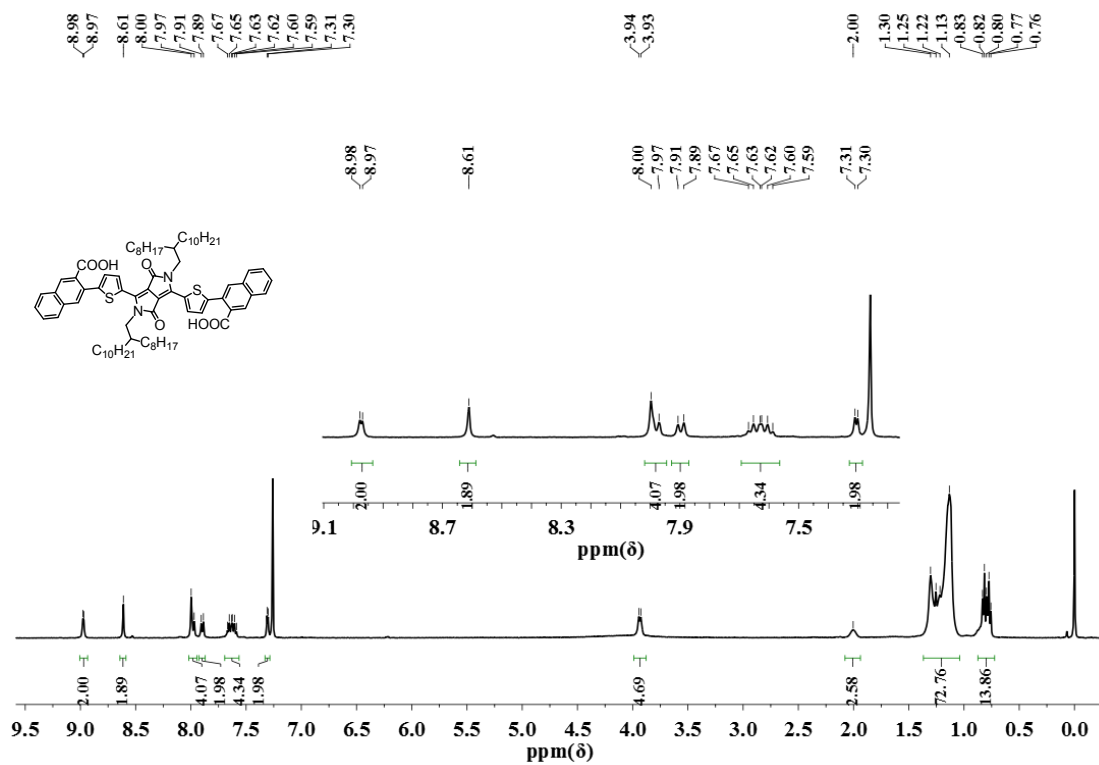

Figure S6 <sup>1</sup>H NMR spectra of 3,3'-(5,5'-(2,5-bis(2-octyldodecyl)-3,6-dioxo-2,3,5,6-tetrahydro-pyrrolo[3,4-c]pyrrole-1,4-diyl)bis(thiophene-5,2-diyl))bis(2-naphthoic acid) (8).



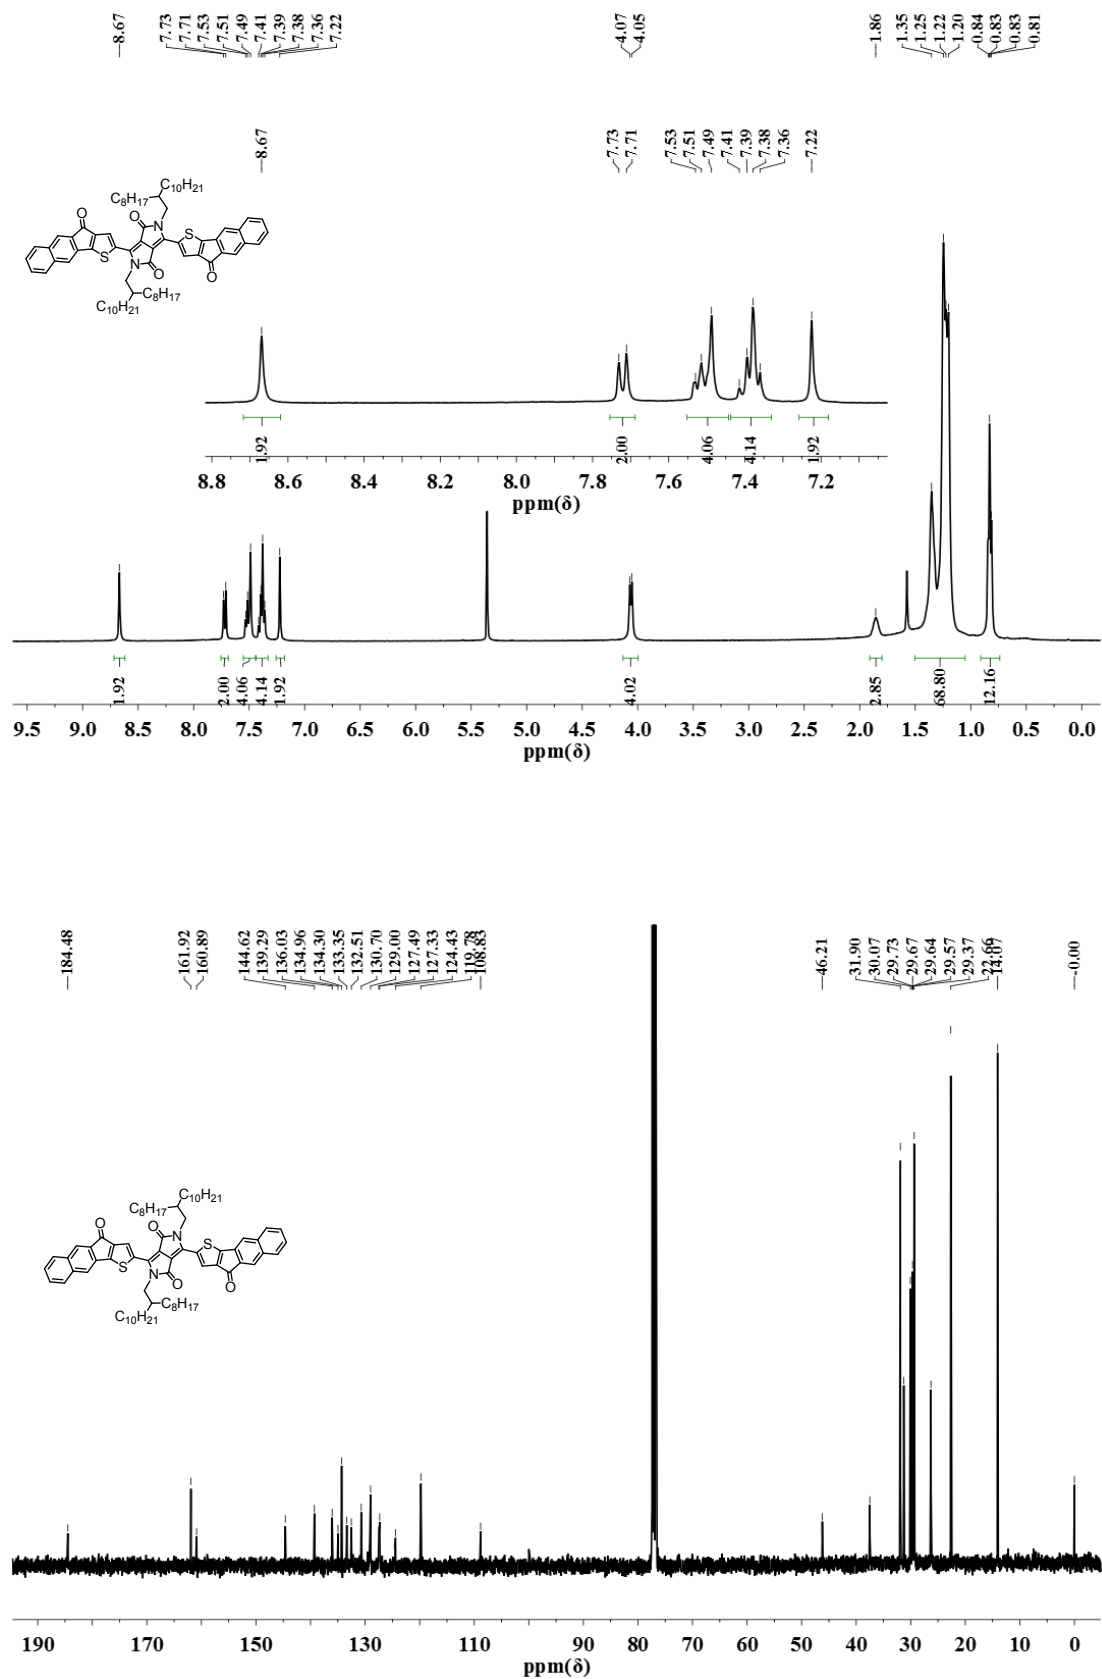

Figure S7 <sup>1</sup>H NMR (top) and <sup>13</sup>C NMR (bottom) spectra of 2,5-bis(2-octyl-dodecyl)-3,6-bis(4-oxo-4H-benzo[5,6]indeno[1,2-*b*]thiophen-2-yl)pyrrolo[3,4-*c*]pyrrole-1,4(2H,5H)-dione (**DPP-NaCO**)

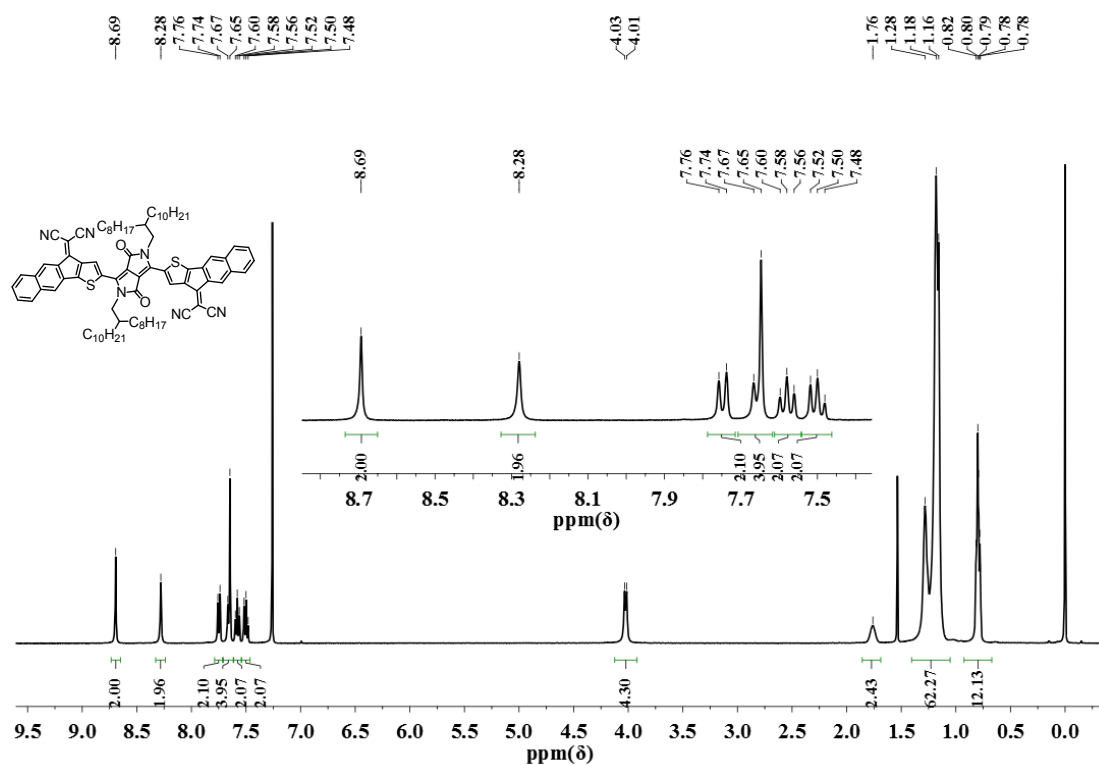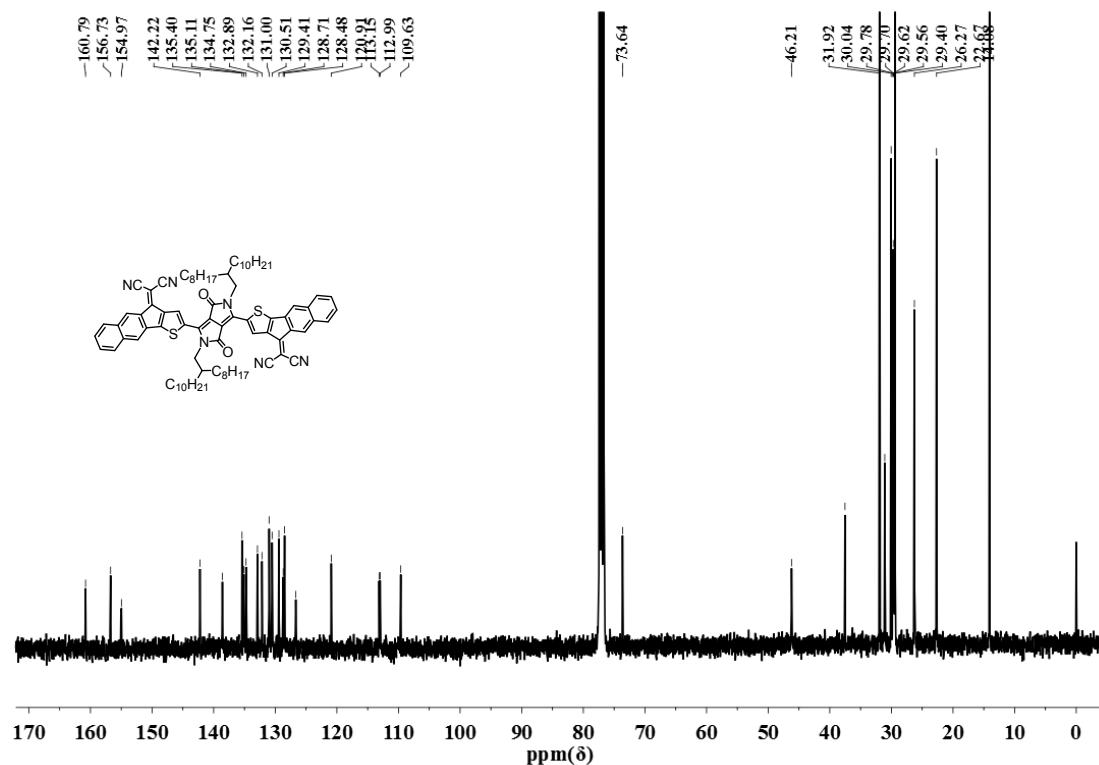

Figure S8  $^1\text{H}$  NMR (top) and  $^{13}\text{C}$  NMR (bottom) spectra of 2,2'-(2,2'-(2,5-bis(2-octyldodecyl)-3,6-dioxo-2,3,5,6-tetrahydro-pyrrolo[3,4-*c*]pyrrole-1,4-diyl)bis(4H-benzo[5,6]indeno[1,2-*b*]thiophene-2-yl-4-ylidene))dimalononitrile (**DPP-NaCN**)

D:\Data\2014\06\13\SH10\_I1711

Comment 1 DCTB

Comment 2

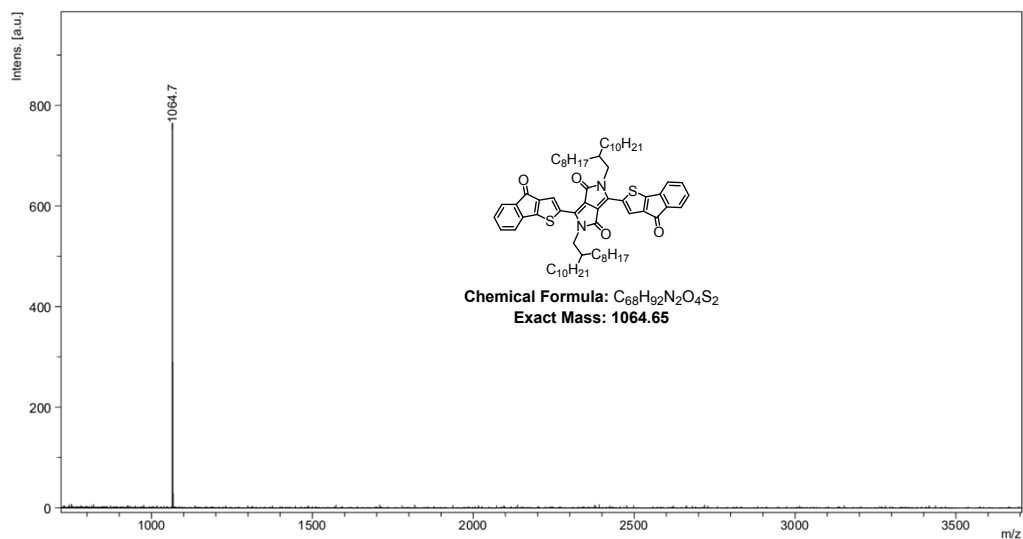

Bruker Daltonics flexAnalysis

printed: 6/13/2014 2:22:55 PM

Figure S9. MALDI-TOF MS spectrum of **DPP-PhCO**.

D:\Data\2014\06\19\SH10\_L2111

Comment 1 DCTB

Comment 2

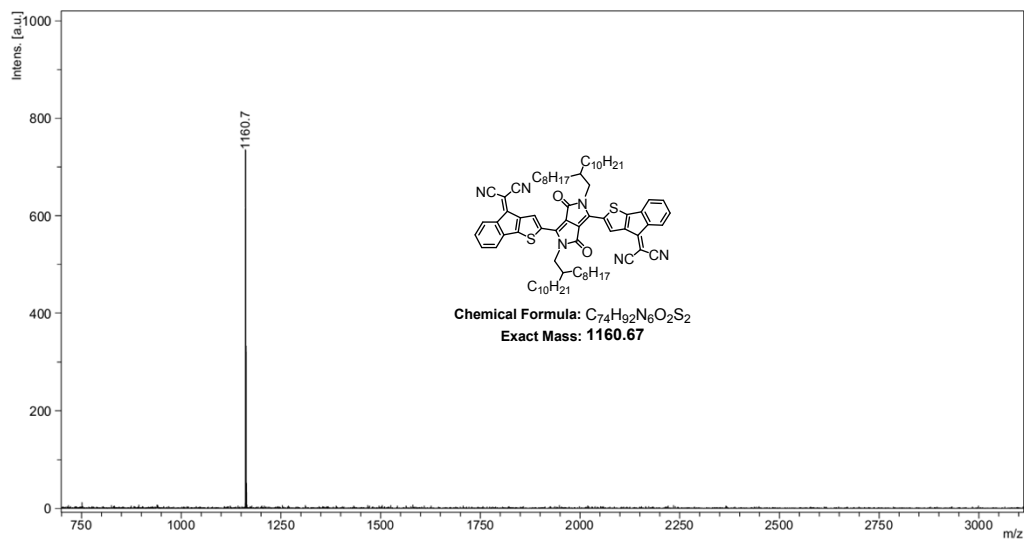

Bruker Daltonics flexAnalysis

printed: 6/20/2014 11:07:59 AM

Figure S10. MALDI-TOF MS spectrum of **DPP-PhCN**.

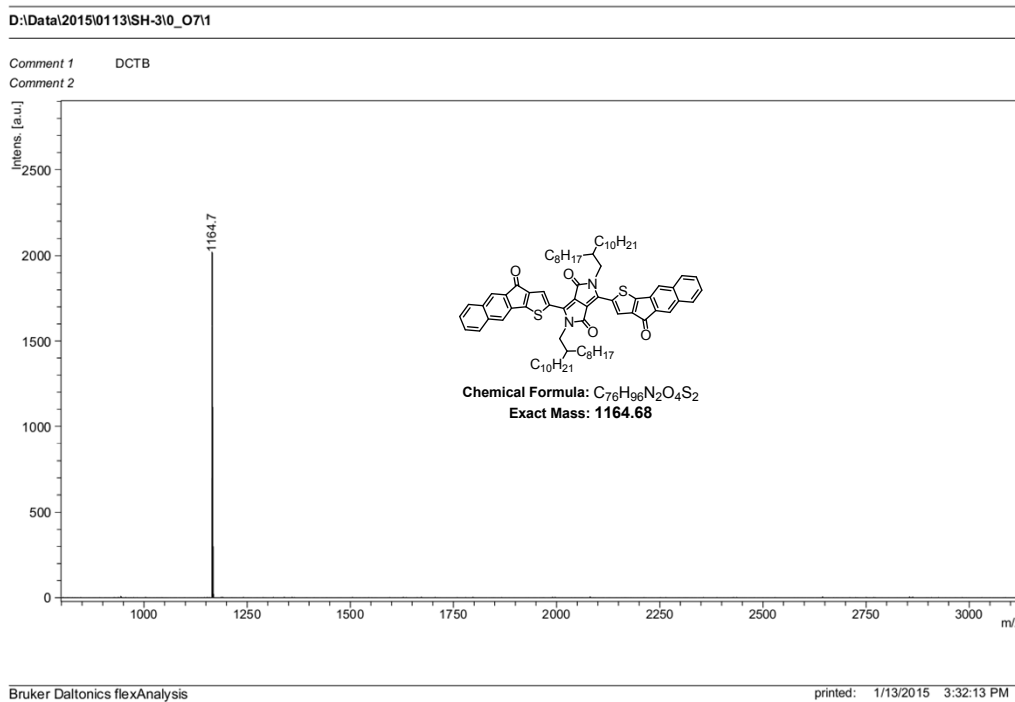

Figure S11. MALDI-TOF MS spectrum of **DPP-NaCO**.

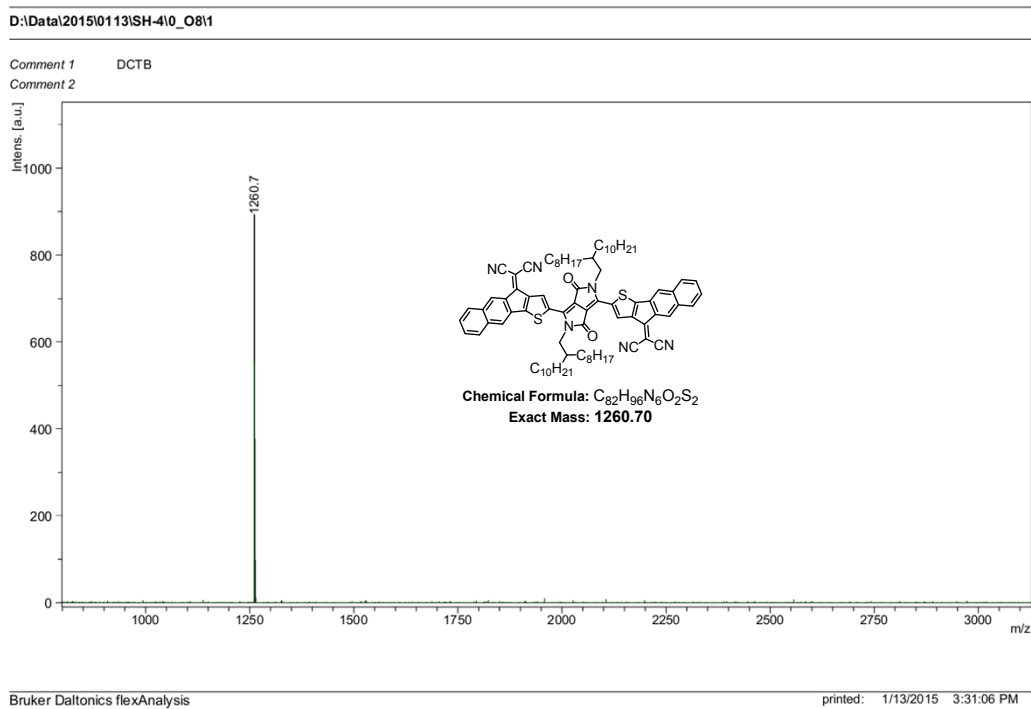

Figure S12. MALDI-TOF MS spectrum of **DPP-NaCN**.

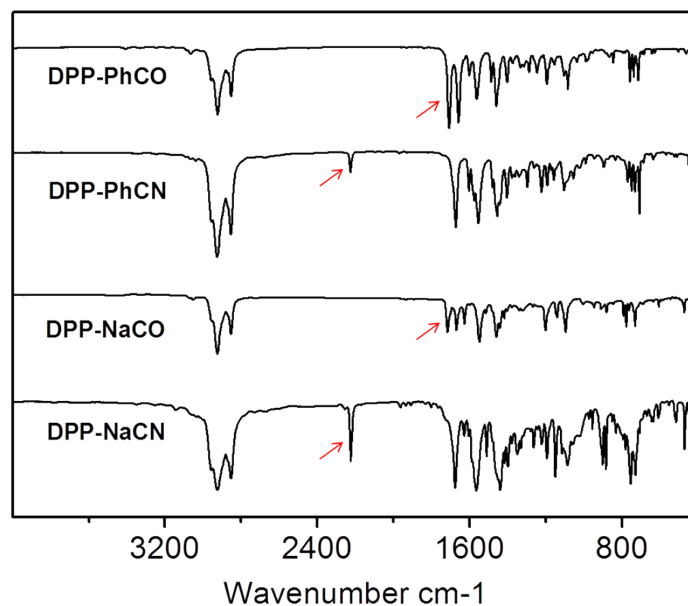

Figure S13. Infrared (IR) absorption spectra of **DPP-PhCO**, **DPP-PhCN**, **DPP-NaCO** and **DPP-NaCN**.

### **OTFT fabrication and measurement**

Bottom-gate/top-contact (BG/TC) OTFTs were fabricated on heavily *n*-doped Si wafers with 300 nm thickness of SiO<sub>2</sub> as the gate dielectric layer, which was modified with octadecyltrichlorosilane (ODTS) according to literature.<sup>[1]</sup> The active layer was spin-coated at 1000 rpm in ambient conditions from *o*-xylene solution with a concentration of 0.9 wt%. Then Au source and drain electrodes were evaporated under vacuum with a shadow mask (channel length  $L = 100 \mu\text{m}$ , channel width  $W = 3 \text{ mm}$ ). OTFT devices were tested with two Keithley 336 units under ambient conditions.

[1] Y. Zhang, C. Kim, J. Lin and T.-Q. Nguyen, *Adv. Funct. Mater.*, 2012, **22**, 97.

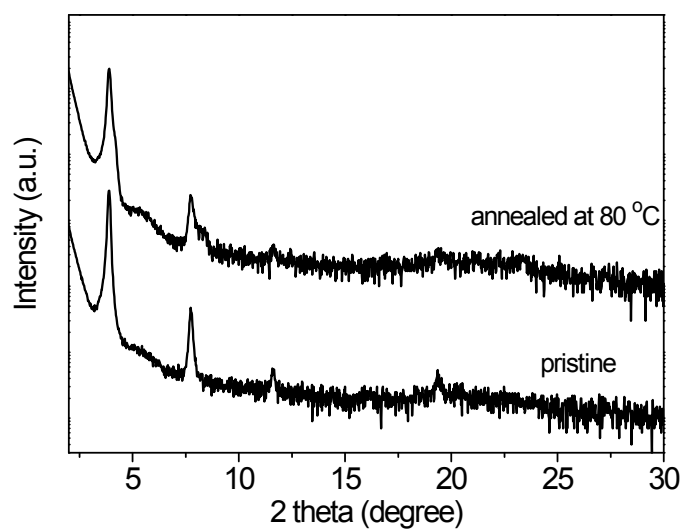

Figure S14. Out-of-plane XRD patterns of pristine and thermally annealed films of **DPP-Ph**. The thermal annealing was done at 80 °C for 10 min.

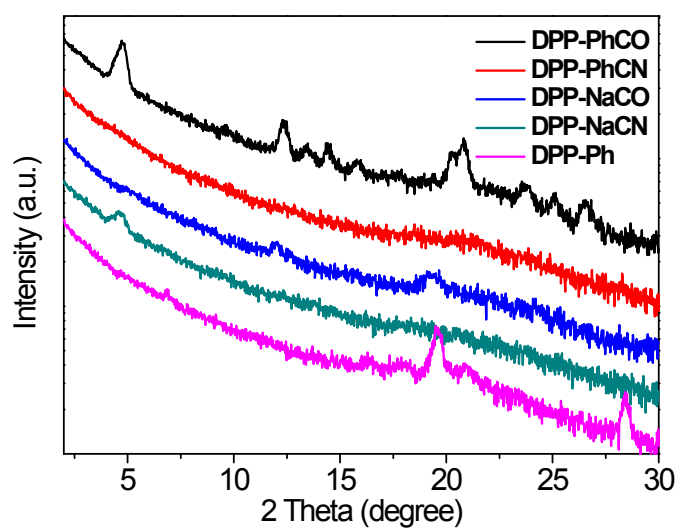

Figure S15. In-plane XRD patterns of pristine **DPP-Ph** films and thermally annealed films of **DPP-PhCO**, **DPP-PhCN**, **DPP-NaCO** and **DPP-NaCN**. The thermal annealing was done at 150 °C for **DPP-PhCO**, **DPP-NaCO** and **DPP-NaCN** and at 80 °C for **DPP-PhCN**.
